# Supplementary material
Source: ML conference proceedings conference paper supplement (https://openaccess.thecvf.com/content/CVPR2026/html/Li_Towards_Highly_Transferable_CVPR_2026_paper.html)
Supplement: Supplementary file 1 [file Li_Towards_Highly_Transferable_CVPR_2026_supplemental.pdf]

# Towards Highly Transferable Vision-Language Attack via Semantic-Augmented Dynamic Contrastive Interaction

## Supplementary Material

In this paper, we provide an illustration of the semantic augmentation module, experimental results on the MSCOCO dataset, an evaluation of the effectiveness of the semantic augmentation module, and additional visualizations of the adversarial examples. Furthermore, we also report the attack success rate at Rank-1 (R@1), Rank-5 (R@5), and Rank-10 (R@10) on the Flickr30K dataset.

### 7. Semantic Augmentation Module

Figure 5 illustrates the Semantic Augmentation Module. For image local semantic augmentation, the module obtains enlarged local regions by randomly cropping and re-sizing parts of the image, followed by the application of random image augmentation functions to diversify the local semantic content. For text mixed semantic augmentation, the module randomly selects and concatenates pairs of text samples from the text pool to generate a new augmented text set. This approach combines multiple textual descriptions to form broader semantic representations, thereby enhancing semantic diversity.

### 8. Experimental Results on MSCOCO dataset

We conduct comparative experiments on the ITR task using four widely adopted VLP models: ALBEF, TCL, CLIP<sub>VIT</sub> and CLIP<sub>CNN</sub>. Specifically, each VLP model is used as a source model to generate multimodal adversarial examples, which are then evaluated on the remaining three models to assess cross-model transferability. Table 5 presents the comparative results on the MSCOCO dataset. As shown, SADCA consistently achieves the highest average black-box ASR in both TR and IR tasks. These results demonstrate the effectiveness of SADCA in significantly enhancing the cross-model transferability of multimodal adversarial examples.

### 9. Ablation Study for Semantic Augmentation Module

To validate the advantages of the Semantic Augmentation Module, we compare it with other input transformation methods. Specifically, we retain the Dynamic Contrastive Interaction (DCI) component and replace the Semantic Augmentation Module with three alternative input transformation methods: DIM [33], SIA [30], and BSR [27]. As shown in Table 6, SADCA equipped with the Semantic Augmentation Module consistently outperforms the alternatives in most cases. This demonstrates that the Seman-

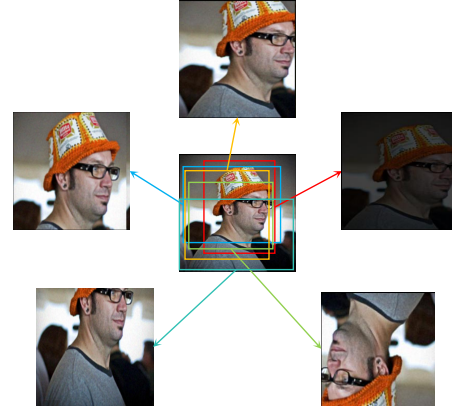

(a) Local semantic image augmentation

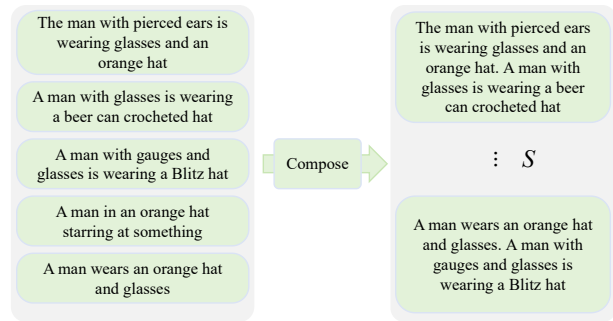

(b) Mixed semantic text augmentation

Figure 5. Semantic Augmentation Module.

tic Augmentation Module is well-suited to VLP models, effectively enhancing the semantic diversity of inputs and thereby disrupting the alignment mechanisms within vision-language models more efficiently.

### 10. A Comparison of Attack Cost

Table 7 summarizes the GPU memory usage, runtime, and attack performance when generating adversarial examples using ALBEF as the surrogate model. SADCA achieves the strongest attack performance, reaching 88.35% (TR R@1) and 88.92% (IR R@1), outperforming all compared methods by a clear margin. Although its GPU memory consumption (13.3 GB) and runtime (4.40 h) are moderately higher than those of simpler baselines, they remain substantially lower than the most computationally expensive method, SA-AET(LI)+SIA, while delivering significantly

Table 5. Comparison with SOTA methods on the image-text retrieval (ITR) task on the MSCOCO dataset. The "Source" column indicates the VLP model used to generate the multimodal adversarial examples. For both image retrieval (IR) and text retrieval (TR), we report the ASR (%) at Rank-1 (R@1). The "Average" represents the average ASR on the black-box VLP models.

| Source              | Attack         | ALBEF        |              | TCL          |              | CLIP <sub>VIT</sub> |              | CLIP <sub>CNN</sub> |              | Average      |              |
|---------------------|----------------|--------------|--------------|--------------|--------------|---------------------|--------------|---------------------|--------------|--------------|--------------|
|                     |                | TR R@1       | IR R@1       | TR R@1       | IR R@1       | TR R@1              | IR R@1       | TR R@1              | IR R@1       | TR R@1       | IR R@1       |
| ALBEF               | PGD            | 94.35        | 93.26        | 34.15        | 36.86        | 21.71               | 27.06        | 23.83               | 30.96        | 26.56        | 31.63        |
|                     | BERT-Attack    | 24.39        | 36.13        | 24.34        | 33.39        | 44.94               | 52.28        | 47.73               | 54.75        | 39.00        | 46.81        |
|                     | Co-Attack      | 94.95        | 97.87        | 65.22        | 72.41        | 55.28               | 62.33        | 56.68               | 66.45        | 59.06        | 67.06        |
|                     | SGA            | 99.95        | 99.94        | 87.46        | 88.17        | 63.72               | 69.71        | 63.91               | 70.78        | 71.70        | 76.22        |
|                     | SGA(LI)+SIA    | 100          | 100          | 98.49        | 98.01        | 75.96               | 79.83        | 76.75               | 81.21        | 83.73        | 86.35        |
|                     | DRA            | 99.90        | 99.93        | 88.81        | 90.06        | 69.25               | 75.31        | 68.53               | 75.09        | 75.53        | 80.15        |
|                     | SA-AET         | 100          | 99.99        | 97.28        | 96.88        | 76.57               | 80.24        | 76.17               | 80.64        | 85.92        | 83.34        |
|                     | SA-AET(LI)+SIA | 100          | 100          | <b>99.66</b> | <b>99.50</b> | 91.87               | 92.69        | 90.56               | 92.84        | 94.03        | 95.01        |
|                     | SADCA (ours)   | <b>100</b>   | <b>100</b>   | 98.35        | 97.99        | <b>93.10</b>        | <b>94.01</b> | <b>93.44</b>        | <b>95.01</b> | <b>94.96</b> | <b>95.67</b> |
| TCL                 | PGD            | 40.81        | 44.09        | 98.54        | 98.20        | 21.79               | 26.92        | 24.97               | 32.17        | 29.19        | 34.39        |
|                     | BERT-Attack    | 35.32        | 45.92        | 38.54        | 48.48        | 51.09               | 58.80        | 52.23               | 61.26        | 46.21        | 55.33        |
|                     | Co-Attack      | 49.84        | 60.36        | 91.68        | 95.48        | 32.64               | 42.69        | 32.06               | 47.82        | 38.85        | 50.29        |
|                     | SGA            | 92.70        | 92.99        | 100          | 100          | 59.79               | 65.31        | 60.52               | 67.34        | 71.00        | 75.21        |
|                     | SGA(LI)+SIA    | 99.94        | 99.43        | 100          | 100          | 74.55               | 78.94        | 78.79               | 82.62        | 84.43        | 86.99        |
|                     | DRA            | 94.72        | 95.89        | 100          | 100          | 70.51               | 74.95        | 70.29               | 76.99        | 78.51        | 82.61        |
|                     | SA-AET         | 97.78        | 98.08        | 100          | 99.99        | 76.12               | 79.74        | 75.89               | 80.92        | 83.26        | 86.25        |
|                     | SA-AET(LI)+SIA | <b>99.85</b> | <b>99.78</b> | 100          | 100          | 90.92               | 92.92        | 92.77               | 94.49        | 94.51        | 95.73        |
|                     | SADCA (ours)   | 99.59        | 99.46        | <b>100</b>   | <b>100</b>   | <b>93.52</b>        | <b>94.39</b> | <b>95.59</b>        | <b>96.62</b> | <b>96.23</b> | <b>96.82</b> |
| CLIP <sub>VIT</sub> | PGD            | 10.26        | 13.69        | 12.72        | 15.81        | 82.91               | 90.51        | 21.62               | 28.78        | 14.87        | 19.43        |
|                     | BERT-Attack    | 20.34        | 29.74        | 21.08        | 29.61        | 45.06               | 51.68        | 44.54               | 53.72        | 28.65        | 37.69        |
|                     | Co-Attack      | 26.35        | 36.69        | 28.23        | 38.42        | 88.78               | 96.72        | 47.36               | 58.45        | 33.98        | 44.52        |
|                     | SGA            | 43.75        | 51.08        | 44.05        | 51.02        | 100                 | 100          | 70.66               | 75.58        | 52.82        | 59.23        |
|                     | SGA(LI)+SIA    | 62.49        | 65.52        | 64.07        | 65.21        | 100                 | 100          | 93.09               | 94.80        | 73.22        | 75.18        |
|                     | DRA            | 52.69        | 61.50        | 51.88        | 61.06        | 100                 | 100          | 80.18               | 84.11        | 61.58        | 68.89        |
|                     | SA-AET         | 57.64        | 66.88        | 57.30        | 65.16        | 100                 | 100          | 83.98               | 86.72        | 66.31        | 72.92        |
|                     | SA-AET(LI)+SIA | 86.23        | 87.47        | 85.42        | 86.16        | 100                 | 100          | 97.59               | 97.96        | 89.75        | 90.53        |
|                     | SADCA (ours)   | <b>90.79</b> | <b>91.09</b> | <b>88.46</b> | <b>87.90</b> | <b>100</b>          | <b>100</b>   | <b>99.51</b>        | <b>99.53</b> | <b>92.92</b> | <b>92.84</b> |
| CLIP <sub>CNN</sub> | PGD            | 8.38         | 12.73        | 11.90        | 15.68        | 13.66               | 20.62        | 92.68               | 94.71        | 11.31        | 16.34        |
|                     | BERT-Attack    | 23.38        | 34.64        | 24.58        | 29.61        | 51.28               | 57.49        | 54.43               | 62.17        | 33.08        | 40.58        |
|                     | Co-Attack      | 29.49        | 41.50        | 31.83        | 43.44        | 53.15               | 60.15        | 97.79               | 98.54        | 38.16        | 48.36        |
|                     | SGA            | 36.94        | 46.79        | 38.81        | 48.90        | 62.19               | 67.70        | 97.79               | 98.54        | 45.98        | 54.46        |
|                     | SGA(LI)+SIA    | 37.15        | 45.49        | 39.81        | 48.26        | 65.32               | 72.56        | 100                 | 100          | 47.43        | 55.44        |
|                     | DRA            | 41.40        | 52.25        | 43.62        | 54.15        | 70.43               | 74.14        | 99.80               | 99.92        | 51.82        | 60.18        |
|                     | SA-AET         | 43.62        | 55.19        | 47.01        | 57.39        | 73.67               | 76.90        | 100                 | 99.92        | 54.77        | 63.16        |
|                     | SA-AET(LI)+SIA | 55.35        | 63.75        | 58.49        | 65.66        | 85.5                | 87.41        | 100                 | 100          | 66.45        | 72.27        |
|                     | SADCA (ours)   | <b>62.90</b> | <b>69.64</b> | <b>63.78</b> | <b>69.48</b> | <b>88.45</b>        | <b>91.16</b> | <b>100</b>          | <b>100</b>   | <b>71.71</b> | <b>76.76</b> |

better results. This demonstrates that SADCA offers the most favorable cost-performance balance, providing superior adversarial transferability with a reasonable computational overhead.

## 11. More Results on Flickr30K Dataset

Reporting only the ASR at R@1 (i.e., the correct image no longer appearing at the top rank) is insufficient for a comprehensive evaluation of the robustness of multimodal retrieval models, as the correct sample may merely be shifted

to Rank-2 or Rank-3, which has limited impact on the overall system. In contrast, presenting the attack success rates at R@5 and R@10 provides insight into whether the attack truly disrupts a broader portion of the ranking structure, thereby offering a more complete assessment of the model's vulnerability at the ranking level. Accordingly, we report the ASR at Rank-1, Rank-5, and Rank-10 on the Flickr30K dataset in Table 8 and Table 9. The results show that SADCA achieves strong attack performance across all metrics, indicating its effectiveness in substantially perturbing the retrieval ranking system and demonstrating its stronger

Table 6. Ablation Study for Semantic Augmentation Module.

| Source              | Attack  | ALBEF        |              | TCL          |              | CLIP <sub>VIT</sub> |              | CLIP <sub>CNN</sub> |              |
|---------------------|---------|--------------|--------------|--------------|--------------|---------------------|--------------|---------------------|--------------|
|                     |         | TR R@1       | IR R@1       | TR R@1       | IR R@1       | TR R@1              | IR R@1       | TR R@1              | IR R@1       |
| ALBEF               | DCI+DIM | 100          | 100          | 94.73        | 94.05        | 73.37               | 77.93        | 74.46               | 77.77        |
|                     | DCI+SIA | 100          | 100          | <b>99.58</b> | <b>99.57</b> | 70.55               | 74.58        | 73.18               | 78.66        |
|                     | DCI+BSR | 100          | 100          | 98.74        | 98.86        | 77.30               | 79.19        | 78.80               | 82.20        |
|                     | SADCA   | <b>100</b>   | <b>100</b>   | 98.52        | 97.83        | <b>81.10</b>        | <b>82.83</b> | <b>85.44</b>        | <b>86.11</b> |
| TCL                 | DCI+DIM | 97.60        | 97.26        | 100          | 100          | 75.71               | 80.54        | 80.08               | 83.53        |
|                     | DCI+SIA | <b>100</b>   | <b>99.95</b> | 100          | 100          | 71.66               | 78.38        | 79.44               | 83.40        |
|                     | DCI+BSR | 100          | 99.86        | 100          | 100          | <b>79.97</b>        | 82.89        | 86.39               | 88.30        |
|                     | SADCA   | 99.58        | 99.56        | <b>100</b>   | <b>100</b>   | 78.28               | <b>83.18</b> | <b>86.46</b>        | <b>88.71</b> |
| CLIP <sub>VIT</sub> | DCI+DIM | 49.95        | 57.60        | 48.37        | 57.57        | 100                 | 100          | 80.59               | 82.64        |
|                     | DCI+SIA | 77.69        | 80.24        | 79.45        | 81.98        | 100                 | 100          | 96.93               | 96.64        |
|                     | DCI+BSR | 79.35        | 81.55        | 80.30        | 82.83        | 100                 | 100          | 96.96               | 97.32        |
|                     | SADCA   | <b>87.07</b> | <b>89.20</b> | <b>87.04</b> | <b>87.98</b> | <b>100</b>          | <b>100</b>   | <b>97.90</b>        | <b>97.46</b> |
| CLIP <sub>CNN</sub> | DCI+DIM | 23.77        | 40.34        | 29.5         | 43.33        | 56.69               | 65.01        | 100                 | 100          |
|                     | DCI+SIA | 42.46        | 55.96        | 47.63        | 60.02        | 76.56               | 80.80        | 100                 | 100          |
|                     | DCI+BSR | 37.02        | 51.50        | 44.26        | 55.79        | 69.20               | 75.58        | 100                 | 100          |
|                     | SADCA   | <b>49.43</b> | <b>60.55</b> | <b>55.53</b> | <b>63.19</b> | <b>77.18</b>        | <b>79.57</b> | <b>100</b>          | <b>100</b>   |

Table 7. Comparison of attack costs. GPU memory usage, runtime, and attack performance when generating adversarial examples on the Flickr30K dataset using ALBEF as the surrogate model.

| Methods        | GPU Memory (GB) | Run Time (h) | TR R@1 | IR R@1 |
|----------------|-----------------|--------------|--------|--------|
| SGA            | 10.5            | 0.83         | 54.72  | 61.54  |
| SGA(LI)+SIA    | 13.0            | 3.95         | 67.99  | 72.07  |
| DRA            | 10.6            | 1.57         | 62.46  | 69.06  |
| SA-AET         | 10.5            | 2.12         | 69.74  | 75.17  |
| SA-AET(LI)+SIA | 13.5            | 11.08        | 83.85  | 86.12  |
| SADCA          | 13.3            | 4.40         | 88.35  | 88.92  |

attack capability.

## 12. Visualization

Figure 6 shows the visualization of randomly selected clean examples and adversarial examples. Figure 7 shows the description of commercial LVLMS for the adversarial images generated by SADCA. It can be seen that it is capable of effectively attacking various commercial LVLMS.

Table 8. Comparison with SOTA methods on the image-text retrieval (ITR) task on the Flickr30K dataset. The "Source" column indicates the VLP model used to generate the multimodal adversarial examples. For text retrieval (TR), we report the ASR (%) at Rank-1 (R@1), Rank-5 (R@5) and Rank-10 (R@10).

| Source              | Attack         | ALBEF        |              |              | TCL          |              |              | CLIP <sub>VIT</sub> |              |              | CLIP <sub>CNN</sub> |              |         |
|---------------------|----------------|--------------|--------------|--------------|--------------|--------------|--------------|---------------------|--------------|--------------|---------------------|--------------|---------|
|                     |                | TR R@1       | TR R@5       | TR R@10      | TR R@1       | TR R@5       | TR R@10      | TR R@1              | TR R@5       | TR R@10      | TR R@1              | TR R@5       | TR R@10 |
| ALBEF               | SGA            | 99.90        | 99.70        | 99.70        | 87.88        | 77.79        | 71.74        | 36.69               | 19.83        | 12.40        | 39.59               | <b>21.88</b> | 14.83   |
|                     | SGA+SIA        | 99.79        | 99.50        | 99.20        | 94.10        | 88.74        | 85.07        | 47.48               | 29.60        | 21.75        | 53.77               | 34.46        | 24.82   |
|                     | SGA(LI)        | 100          | 100          | 100          | 84.19        | 73.17        | 67.43        | 4.36                | 15.47        | 10.06        | 36.53               | 19.77        | 12.36   |
|                     | SGA(LI)+SIA    | 100          | 100          | 100          | 99.37        | 98.29        | 97.80        | 49.82               | 32.40        | 23.68        | 54.79               | 35.31        | 28.01   |
|                     | DRA            | 99.90        | 99.70        | 99.70        | 91.57        | 81.31        | 75.95        | 46.26               | 25.44        | 18.60        | 49.55               | 29.49        | 21.22   |
|                     | SA-AET         | 99.90        | 99.80        | 99.80        | 96.42        | 92.36        | 89.98        | 55.58               | 34.48        | 26.32        | 57.22               | 39.64        | 28.53   |
|                     | SA-AET+SIA     | 99.58        | 99.30        | 98.80        | 95.21        | 90.01        | 85.97        | 64.54               | 41.64        | 34.04        | 66.16               | 44.82        | 36.35   |
|                     | SA-AET(LI)     | 100          | 100          | 100          | 98.63        | 97.29        | 96.09        | 60.61               | 38.11        | 30.18        | 62.20               | 41.12        | 32.65   |
|                     | SA-AET(LI)+SIA | 100          | 100          | 100          | <b>99.58</b> | <b>98.89</b> | <b>98.50</b> | 75.71               | 60.12        | 52.13        | 76.25               | 61.21        | 53.66   |
| SADCA               | <b>100</b>     | <b>100</b>   | <b>100</b>   | 98.52        | 96.28        | 94.79        | <b>81.10</b> | <b>62.10</b>        | <b>55.08</b> | <b>85.44</b> | <b>72.09</b>        | <b>65.91</b> |         |
| TCL                 | SGA            | 92.40        | 87.07        | 85.40        | 100          | 100          | 99.90        | 36.81               | 18.59        | 13.11        | 41.89               | 22.73        | 14.93   |
|                     | SGA+SIA        | 97.18        | 94.19        | 91.90        | 100          | 99.70        | 99.60        | 53.01               | 33.13        | 27.03        | 58.49               | 41.33        | 32.34   |
|                     | SGA(LI)        | 84.46        | 76.25        | 71.50        | 100          | 100          | 100          | 31.17               | 15.06        | 9.86         | 36.78               | 20.08        | 14.01   |
|                     | SGA(LI)+SIA    | 99.90        | 99.70        | 99.60        | 100          | 99.90        | 99.90        | 52.87               | 33.85        | 26.22        | 62.45               | 44.19        | 36.87   |
|                     | DRA            | 95.20        | 91.28        | 88.00        | 100          | 100          | 99.80        | 47.24               | 26.48        | 18.90        | 52.23               | 30.76        | 22.97   |
|                     | SA-AET         | 98.85        | 96.79        | 95.50        | 100          | 100          | 100          | 56.20               | 34.68        | 25.91        | 59.77               | 39.22        | 30.07   |
|                     | SA-AET+SIA     | 97.08        | 93.79        | 92.60        | 99.79        | 99.60        | 99.20        | 67.36               | 49.53        | 40.65        | 70.11               | 54.65        | 46.14   |
|                     | SA-AET(LI)     | 99.37        | 98.60        | 98.20        | 100          | 100          | 100          | 56.20               | 37.49        | 28.05        | 62.32               | 42.81        | 32.75   |
|                     | SA-AET(LI)+SIA | <b>99.95</b> | <b>99.90</b> | <b>99.80</b> | 100          | 100          | 100          | 77.04               | 65.52        | 57.52        | 80.20               | 67.86        | 61.59   |
| SADCA               | 99.58          | 99.20        | 99.00        | <b>100</b>   | <b>100</b>   | <b>100</b>   | <b>78.28</b> | <b>65.94</b>        | <b>58.64</b> | <b>86.46</b> | <b>76.74</b>        | <b>69.93</b> |         |
| CLIP <sub>VIT</sub> | SGA            | 22.42        | 9.02         | 5.20         | 25.08        | 9.55         | 6.01         | 100                 | 100          | 99.90        | 53.26               | 33.83        | 25.33   |
|                     | SGA+SIA        | 44.94        | 25.65        | 19.60        | 47.10        | 27.24        | 20.44        | 99.88               | 99.48        | 99.09        | 81.48               | 65.12        | 55.10   |
|                     | SGA(LI)        | 21.17        | 8.92         | 5.60         | 23.71        | 8.74         | 5.51         | 100                 | 100          | 100          | 49.43               | 31.40        | 21.52   |
|                     | SGA(LI)+SIA    | 54.33        | 34.37        | 27.90        | 57.43        | 36.88        | 30.76        | 100                 | 100          | 100          | 89.02               | 80.66        | 72.61   |
|                     | DRA            | 27.84        | 12.73        | 8.10         | 27.82        | 12.46        | 7.52         | 100                 | 100          | 100          | 64.88               | 42.49        | 33.47   |
|                     | SA-AET         | 36.60        | 20.64        | 16.00        | 39.20        | 20.30        | 14.33        | 100                 | 100          | 100          | 71.01               | 50.11        | 41.50   |
|                     | SA-AET+SIA     | 54.54        | 36.17        | 30.20        | 58.59        | 38.79        | 31.96        | 99.63               | 99.48        | 98.98        | 83.91               | 69.34        | 62.00   |
|                     | SA-AET(LI)     | 45.57        | 28.76        | 21.80        | 46.89        | 27.44        | 21.14        | 100                 | 100          | 100          | 78.67               | 60.89        | 52.01   |
|                     | SA-AET(LI)+SIA | 79.04        | 64.33        | 58.40        | 79.35        | 66.33        | 59.72        | 100                 | 100          | 100          | 94.76               | 89.32        | 85.79   |
| SADCA               | <b>87.07</b>   | <b>74.85</b> | <b>68.40</b> | <b>87.04</b> | <b>74.07</b> | <b>66.93</b> | <b>100</b>   | <b>100</b>          | <b>100</b>   | <b>97.90</b> | <b>92.81</b>        | <b>89.91</b> |         |
| CLIP <sub>CNN</sub> | SGA            | 15.64        | 5.61         | 3.00         | 18.02        | 6.03         | 2.91         | 39.92               | 20.15        | 13.52        | 99.87               | 99.47        | 99.07   |
|                     | SGA+SIA        | 19.29        | 6.11         | 4.00         | 22.76        | 8.34         | 5.21         | 46.50               | 23.88        | 16.16        | 99.62               | 97.99        | 96.81   |
|                     | SGA(LI)        | 15.51        | 5.61         | 2.50         | 17.70        | 6.13         | 3.51         | 38.16               | 18.38        | 12.30        | 99.87               | 99.89        | 99.90   |
|                     | SGA(LI)+SIA    | 20.96        | 9.02         | 5.40         | 22.55        | 11.06        | 7.21         | 47.24               | 26.27        | 19.41        | 100                 | 99.68        | 99.38   |
|                     | DRA            | 19.50        | 6.31         | 3.70         | 21.60        | 7.54         | 3.81         | 48.47               | 26.27        | 17.89        | 99.87               | 25.13        | 99.38   |
|                     | SA-AET         | 23.98        | 9.22         | 6.00         | 27.29        | 10.45        | 6.61         | 54.11               | 33.33        | 24.39        | 100                 | 100          | 99.90   |
|                     | SA-AET+SIA     | 26.80        | 12.63        | 8.70         | 31.61        | 13.77        | 8.52         | 57.18               | 35.62        | 25.20        | 99.49               | 98.31        | 96.70   |
|                     | SA-AET(LI)     | 31.07        | 15.03        | 12.00        | 33.19        | 15.08        | 11.62        | 61.72               | 43.09        | 34.45        | 100                 | 100          | 100     |
|                     | SA-AET(LI)+SIA | 38.69        | 20.74        | 17.10        | 44.89        | 25.13        | 19.74        | 69.57               | 52.34        | 42.89        | 100                 | 99.79        | 99.79   |
| SADCA               | <b>49.43</b>   | <b>26.05</b> | <b>20.90</b> | <b>55.53</b> | <b>30.15</b> | <b>23.45</b> | <b>77.18</b> | <b>56.39</b>        | <b>48.48</b> | <b>100</b>   | <b>100</b>          | <b>100</b>   |         |

Table 9. Comparison with SOTA methods on the image-text retrieval (ITR) task on the Flickr30K dataset. The "Source" column indicates the VLP model used to generate the multimodal adversarial examples. For image retrieval (IR), we report the ASR (%) at Rank-1 (R@1), Rank-5 (R@5) and Rank-10 (R@10).

| Source              | Attack         | ALBEF        |              |              | TCL          |              |              | CLIP <sub>VIT</sub> |              |              | CLIP <sub>CNN</sub> |              |         |
|---------------------|----------------|--------------|--------------|--------------|--------------|--------------|--------------|---------------------|--------------|--------------|---------------------|--------------|---------|
|                     |                | IR R@1       | IR R@5       | IR R@10      | IR R@1       | IR R@5       | IR R@10      | IR R@1              | IR R@5       | IR R@10      | IR R@1              | IR R@5       | IR R@10 |
| ALBEF               | SGA            | 99.93        | 99.92        | 99.90        | 88.05        | 77.65        | 71.32        | 46.78               | 29.29        | 22.18        | 49.78               | 32.70        | 24.80   |
|                     | SGA+SIA        | 99.79        | 99.41        | 99.15        | 94.21        | 88.11        | 83.33        | 57.38               | 38.68        | 30.88        | 61.23               | 43.96        | 35.19   |
|                     | SGA(LI)        | 100          | 100          | 100          | 84.50        | 72.94        | 66.21        | 41.04               | 23.41        | 17.60        | 45.18               | 26.95        | 20.71   |
|                     | SGA(LI)+SIA    | 100          | 100          | 100          | 99.02        | 97.40        | 96.28        | 56.19               | 38.03        | 30.77        | 60.99               | 43.86        | 34.63   |
|                     | DRA            | 99.93        | 99.86        | 99.82        | 91.36        | 82.24        | 77.03        | 56.80               | 38.61        | 29.79        | 59.01               | 41.65        | 33.52   |
|                     | SA-AET         | 99.98        | 100          | 99.98        | 96.02        | 92.02        | 89.05        | 63.89               | 45.88        | 36.52        | 65.59               | 48.84        | 40.03   |
|                     | SA-AET+SIA     | 99.72        | 99.36        | 98.99        | 95.21        | 90.01        | 85.97        | 70.04               | 53.47        | 45.12        | 72.25               | 56.55        | 47.73   |
|                     | SA-AET(LI)     | 100          | 100          | 100          | 98.33        | 96.63        | 95.25        | 66.91               | 49.22        | 40.80        | 69.09               | 51.92        | 43.14   |
|                     | SA-AET(LI)+SIA | 100          | <b>100</b>   | 99.98        | <b>99.38</b> | <b>98.78</b> | <b>98.35</b> | 78.58               | 66.36        | 59.70        | 80.41               | 68.15        | 60.49   |
| SADCA               | <b>100</b>     | 99.98        | <b>99.98</b> | 97.83        | 94.60        | 92.65        | <b>82.83</b> | <b>68.89</b>        | <b>61.49</b> | <b>86.11</b> | <b>75.30</b>        | <b>68.92</b> |         |
| TCL                 | SGA            | 92.77        | 87.08        | 83.99        | 100          | 99.96        | 99.96        | 46.97               | 28.97        | 22.15        | 51.53               | 33.26        | 25.55   |
|                     | SGA+SIA        | 97.22        | 94.13        | 92.38        | 99.98        | 99.75        | 99.65        | 61.76               | 44.52        | 36.09        | 65.21               | 49.76        | 41.72   |
|                     | SGA(LI)        | 85.24        | 75.72        | 70.91        | 100          | 100          | 100          | 38.92               | 23.27        | 17.23        | 45.97               | 27.49        | 20.92   |
|                     | SGA(LI)+SIA    | 99.70        | 99.28        | 99.03        | 100          | 99.98        | 99.98        | 59.12               | 42.37        | 35.41        | 65.49               | 50.75        | 42.58   |
|                     | DRA            | 95.58        | 91.10        | 88.66        | 100          | 99.94        | 99.94        | 57.28               | 39.90        | 32.16        | 62.23               | 43.55        | 35.19   |
|                     | SA-AET         | 98.50        | 96.60        | 95.45        | 100          | 100          | 99.96        | 63.47               | 46.55        | 38.64        | 67.86               | 49.90        | 41.52   |
|                     | SA-AET+SIA     | 97.36        | 94.48        | 92.28        | 99.86        | 99.38        | 99.21        | 72.97               | 57.65        | 50.52        | 75.40               | 61.77        | 53.94   |
|                     | SA-AET(LI)     | 99.20        | 98.61        | 98.08        | 100          | 100          | 100          | 64.37               | 47.44        | 40.10        | 69.30               | 51.94        | 44.18   |
|                     | SA-AET(LI)+SIA | <b>99.93</b> | <b>99.82</b> | <b>99.66</b> | 100          | 100          | 100          | 81.48               | 69.75        | 63.65        | 84.05               | 73.85        | 67.47   |
| SADCA               | 99.56          | 98.79        | 98.28        | <b>100</b>   | <b>100</b>   | <b>100</b>   | <b>83.17</b> | <b>70.61</b>        | <b>64.17</b> | <b>88.71</b> | <b>79.69</b>        | <b>74.38</b> |         |
| CLIP <sub>VIT</sub> | SGA            | 34.59        | 18.27        | 13.99        | 36.45        | 19.43        | 14.11        | 100                 | 100          | 100          | 61.10               | 43.50        | 35.83   |
|                     | SGA+SIA        | 55.22        | 35.42        | 28.22        | 56.48        | 37.44        | 29.89        | 99.77               | 99.53        | 99.24        | 83.12               | 69.97        | 62.34   |
|                     | SGA(LI)        | 31.08        | 15.34        | 11.04        | 33.52        | 16.85        | 11.76        | 100                 | 100          | 100          | 56.23               | 37.63        | 30.63   |
|                     | SGA(LI)+SIA    | 60.20        | 41.82        | 33.64        | 62.60        | 43.64        | 36.45        | 100                 | 100          | 100          | 89.24               | 81.00        | 74.95   |
|                     | DRA            | 42.84        | 25.47        | 19.29        | 44.60        | 25.93        | 19.60        | 100                 | 100          | 99.93        | 69.50               | 54.46        | 46.15   |
|                     | SA-AET         | 50.44        | 32.98        | 26.14        | 51.10        | 33.16        | 25.87        | 100                 | 99.93        | 99.93        | 74.10               | 60.24        | 52.72   |
|                     | SA-AET+SIA     | 65.13        | 47.27        | 40.80        | 66.33        | 49.14        | 42.06        | 99.87               | 99.32        | 98.95        | 85.69               | 74.82        | 68.74   |
|                     | SA-AET(LI)     | 57.16        | 39.60        | 32.57        | 57.52        | 39.47        | 31.90        | 100                 | 100          | 100          | 80.17               | 66.50        | 59.59   |
|                     | SA-AET(LI)+SIA | 82.74        | 70.14        | 63.89        | 82.57        | 70.73        | 64.38        | 99.97               | 99.84        | 99.83        | 95.23               | 90.83        | 87.51   |
| SADCA               | <b>89.20</b>   | <b>75.84</b> | <b>68.90</b> | <b>87.98</b> | <b>73.91</b> | <b>67.00</b> | <b>100</b>   | <b>99.98</b>        | <b>99.98</b> | <b>97.46</b> | <b>93.98</b>        | <b>91.48</b> |         |
| CLIP <sub>CNN</sub> | SGA            | 28.06        | 15.01        | 10.68        | 33.07        | 16.66        | 12.02        | 51.45               | 32.19        | 25.27        | 99.90               | 99.73        | 99.64   |
|                     | SGA+SIA        | 33.63        | 17.49        | 12.66        | 37.57        | 20.67        | 15.21        | 54.41               | 36.72        | 38.96        | 99.73               | 98.93        | 97.90   |
|                     | SGA(LI)        | 28.02        | 14.03        | 9.97         | 31.36        | 15.77        | 11.19        | 48.90               | 29.57        | 22.57        | 99.93               | 99.90        | 99.80   |
|                     | SGA(LI)+SIA    | 32.72        | 17.19        | 12.52        | 37.21        | 20.55        | 15.11        | 56.70               | 37.86        | 30.92        | 100                 | 99.95        | 99.86   |
|                     | DRA            | 34.59        | 18.56        | 13.93        | 37.88        | 21.15        | 15.98        | 59.12               | 39.64        | 32.71        | 99.90               | 40.32        | 99.41   |
|                     | SA-AET         | 38.28        | 21.47        | 16.60        | 41.81        | 24.62        | 18.03        | 64.21               | 44.34        | 36.46        | 99.97               | 99.71        | 99.50   |
|                     | SA-AET+SIA     | 41.53        | 24.65        | 19.07        | 46.62        | 28.24        | 21.77        | 64.11               | 46.90        | 38.70        | 99.18               | 97.96        | 97.18   |
|                     | SA-AET(LI)     | 44.74        | 27.42        | 21.71        | 47.45        | 29.48        | 23.09        | 68.52               | 52.32        | 44.29        | 100                 | 100          | 100.00  |
|                     | SA-AET(LI)+SIA | 51.80        | 33.65        | 26.95        | 56.33        | 38.00        | 31.07        | 74.68               | 59.87        | 52.33        | 100                 | 99.93        | 99.89   |
| SADCA               | <b>60.55</b>   | <b>38.31</b> | <b>30.89</b> | <b>63.19</b> | <b>41.29</b> | <b>33.10</b> | <b>79.57</b> | <b>64.07</b>        | <b>56.17</b> | <b>100</b>   | <b>100</b>          | <b>100</b>   |         |

|                     |                                                                                                   |                                                                                                |                                                                                     |                                                                                               |                                                                                       |
|---------------------|---------------------------------------------------------------------------------------------------|------------------------------------------------------------------------------------------------|-------------------------------------------------------------------------------------|-----------------------------------------------------------------------------------------------|---------------------------------------------------------------------------------------|
| Clean example       |                  |               |    |             |    |
|                     | <p>A man with gauges and glasses is wearing a Blitz hat</p>                                       | <p>A black and white dog is running in a grassy garden surrounded by a white fence</p>         | <p>A group of snowmobile riders gather in the snow</p>                              | <p>Two men on a rooftop while another man stands atop a ladder watching them</p>              | <p>Man taking a photograph of a well dressed group of teens</p>                       |
| Adversarial example |                  |               |    |             |    |
|                     | <p>A man with gauges and glasses is wearing a blitz <b>blitz</b></p>                              | <p>A black and white dog is running in a grassy garden surrounded by a white <b>yellow</b></p> | <p>A group of <b>. watch</b> riders gather in the snow</p>                          | <p>Two men on a <b>small</b> rooftop while another man stands atop a ladder watching them</p> | <p>Man <b>rights</b> a photograph of a well dressed group of teens</p>                |
| Clean example       |                 |              |   |            |   |
|                     | <p>The people are quietly listening while the story of the ice cabin was explained to them</p>    | <p>A baseball catcher trying to tag a base runner in a baseball game</p>                       | <p>A man wearing a hat and a white shirt is cleaning windows</p>                    | <p>Man in bright yellow vest displays bicycle safety information on street</p>                | <p>A woman gives a small child a piggyback ride</p>                                   |
| Adversarial example |                |             |  |           |  |
|                     | <p>The people are quietly <b>quiet</b> while the story of the ice cabin was explained to them</p> | <p>A baseball <b>lego</b> trying to tag a base runner in a baseball game</p>                   | <p>A man wearing a hat and a white shirt is <b>starts</b> windows</p>               | <p>Man in bright <b>smart</b> vest displays bicycle safety information on street</p>          | <p>A woman gives a small child a <b>a</b> ponynies ride</p>                           |

Figure 6. Visualization of original images and the corresponding adversarial examples generated by our proposed SADCA.

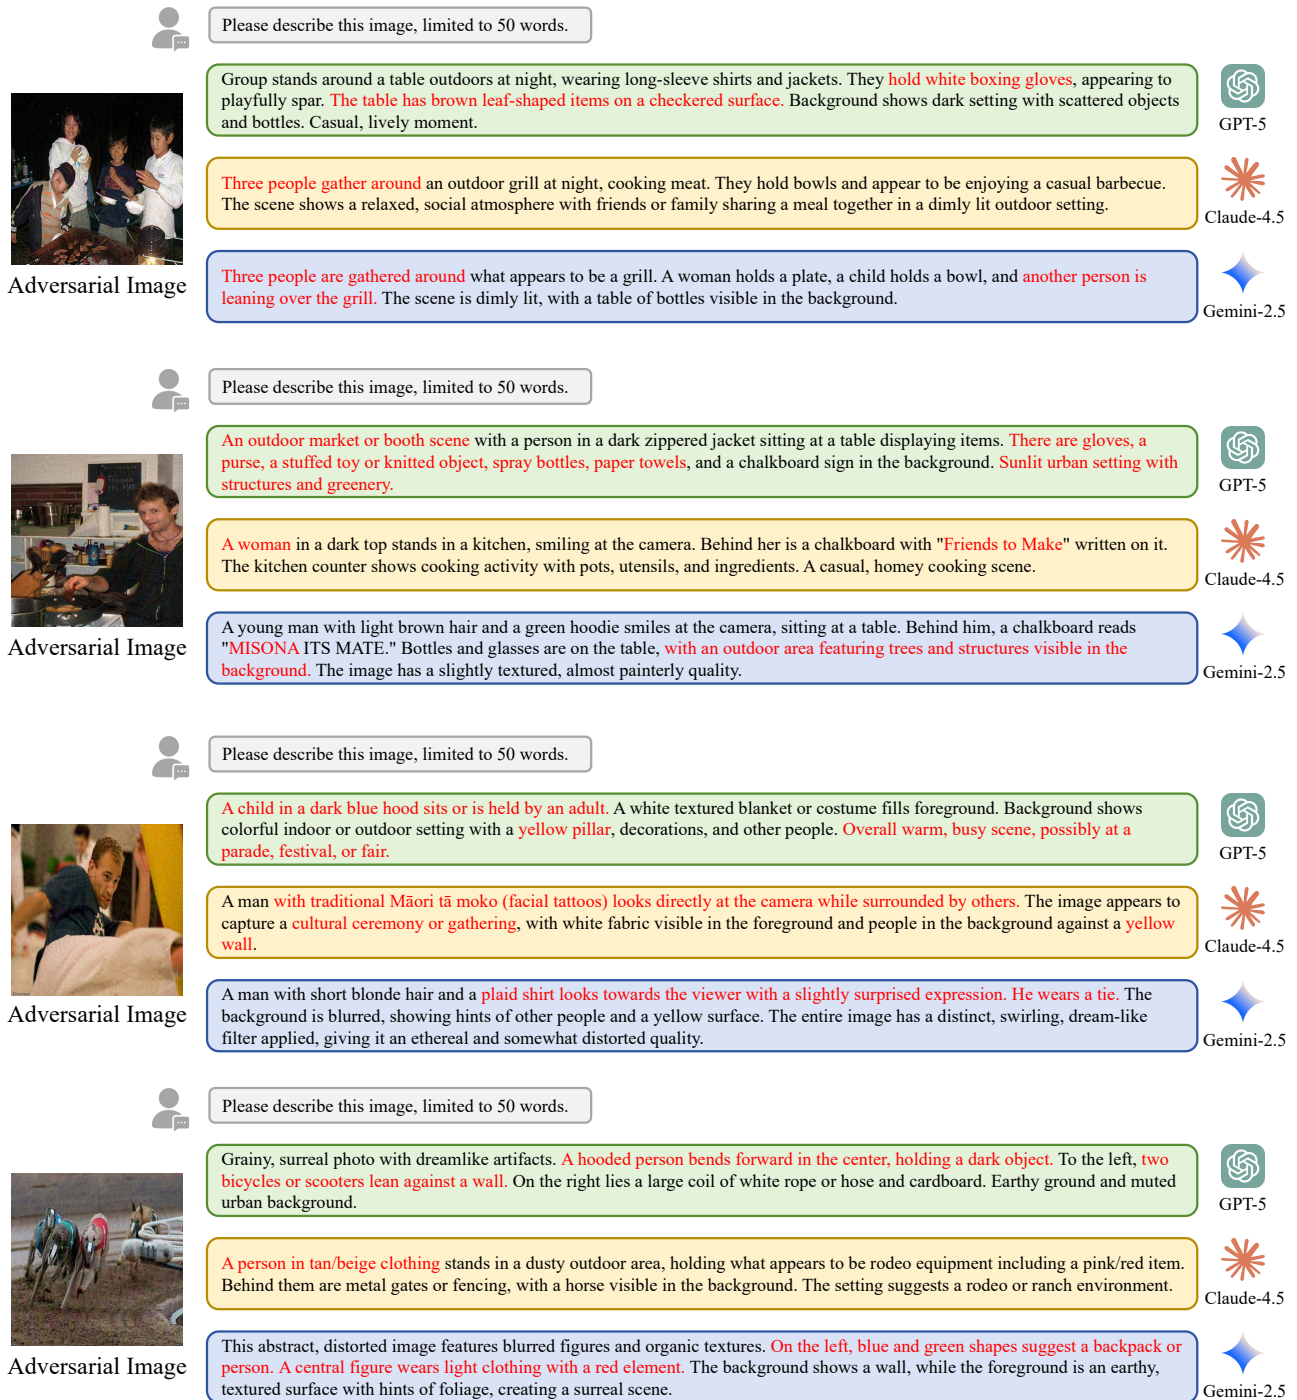

Figure 7. Visualization of adversarial images in attacking commercial LVMs.
